# Supplementary material for: Detection of Lymphoid Markers (CD3 and PAX5) for Immunophenotyping in Dogs and Cats: Comparison of Stained Cytology Slides and Matched Cell Blocks
Source: MDPI journal article supplement (doi:10.3390/vetsci10020157), 2023-02-15

**Figure S2:** Negative and positive controls of the immunostaining protocol. **A)** Cytology smear used as negative control. No staining in cellular or non-cellular structures was observed, even in the presence of a bloody background. **B)** Histologic section of a normal lymph node collected during necropsy used as negative control. Similarly, no staining was noted and the background was completely clear. **C)** Membranous CD3 staining in normal lymphocytes from the paracortical areas of a hyperplastic lymph node used as positive control. **D)** Clear and strong nuclear PAX5 immunolabeling in the cortical B-cell lymphocytes of a hyperplastic lymph node, used as the histologic positive control. Diaminobenzidine chromogen, Haematoxylin counterstain. bar = 40  $\mu$ m (A) and 67  $\mu$ m (B, C and D).

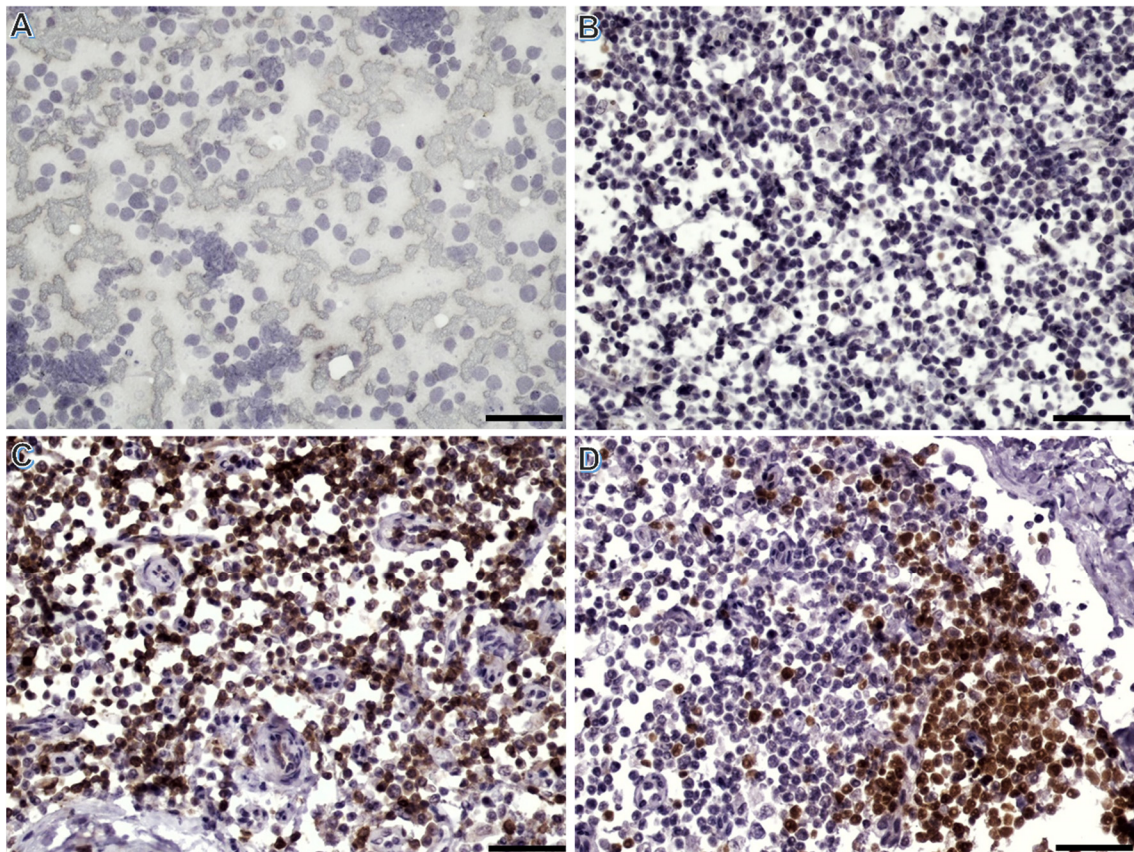

Supplement: s1 [file s1]
