# Supplementary material for: Detection of Lymphoid Markers (CD3 and PAX5) for Immunophenotyping in Dogs and Cats: Comparison of Stained Cytology Slides and Matched Cell Blocks
Source: MDPI journal article supplement (doi:10.3390/vetsci10020157), 2023-02-15
Supplement: s1 [file s1]

**Tables S3–S6: Contingency tables comparing the results of immunolabeling for CD3 applied to previous Romanowsky-stained cytology slides (RSC) and to the matched cell blocks (CB) in 53 canine and feline lymphomas and 4 lymphocyte-rich (chylous) effusions.**

**Table S3:** Matrix comparing the positivity scores of immunolabeling of CD3 in previous-stained cytology (RSC) and in cell blocks, as assessed by a board-certified pathologist. Score 0: no positive cells; score 1:  $\leq 25\%$ ; score 2:  $>25$  and  $\leq 50\%$ ; score 3:  $>50$  and  $\leq 75\%$ ; score 4:  $> 75\%$  of positive cells.

| RSC | CB |   |   |   |   |
|-----|----|---|---|---|---|
|     | 0  | 1 | 2 | 3 | 4 |
| 0   | 10 | 8 | 1 | 3 | 8 |
| 1   | 3  | 8 | 1 | 0 | 2 |
| 2   | 1  | 0 | 0 | 1 | 0 |
| 3   | 0  | 0 | 0 | 0 | 3 |
| 4   | 0  | 0 | 0 | 0 | 4 |

**Table S4:** Matrix comparing the intensity of immunolabeling of CD3 in previous-stained cytology (RSC) and in cell blocks (CB), as assessed by a board-certified pathologist. 0: no positive cell; level 1: weak staining; level 2: moderate staining; level 3: intense staining, as compared to controls.

| RSC | CB |   |   |    |
|-----|----|---|---|----|
|     | 0  | 1 | 2 | 3  |
| 0   | 0  | 1 | 6 | 7  |
| 1   | 0  | 1 | 8 | 10 |
| 2   | 0  | 0 | 0 | 9  |
| 3   | 0  | 2 | 0 | 7  |

**Table S5:** Matrix comparing the background staining after the immunolabeling of CD3 in previous-stained cytology (RSC) and in cell blocks (CB), as assessed by a board-certified pathologist. 0: no background staining; 1: weak; 2: moderate; 3: intense background staining.

| RSC | CB |   |   |   |
|-----|----|---|---|---|
|     | 0  | 1 | 2 | 3 |
| 0   | 26 | 4 | 0 | 0 |
| 1   | 10 | 3 | 0 | 0 |
| 2   | 5  | 3 | 0 | 0 |
| 3   | 1  | 0 | 0 | 0 |

**Table S6:** Matrix comparing the presence non-specific staining after the immunolabeling of CD3 in previous-stained cytology (RSC) and in cell blocks (CB), as assessed by a board-certified pathologist. 0: non-specific staining absent; 1: non-specific staining present.

| RSC | CB |   |
|-----|----|---|
|     | 0  | 1 |
| 0   | 32 | 2 |
| 1   | 15 | 3 |

**Supplemental Tables S7–S10: Contingency tables comparing the results of immunolabelling for PAX5 applied to previous Romanowsky-stained cytology slides (RSC) and in matched cell blocks (CB) in 53 canine and feline lymphomas and 4 lymphocyte-rich (chylous) effusions.**

**Table S7:** Matrix comparing the positivity scores of immunolabeling of PAX5 in previous-stained cytology (RSC) and in cell blocks (CB), as assessed by a board-certified pathologist. Score 0: no positive cells; score 1:  $\leq 25\%$ ; score 2:  $>25$  and  $\leq 50\%$ ; score 3:  $>50$  and  $\leq 75\%$ ; score 4:  $> 75\%$  of positive cells.

| RSC | CB |    |   |   |   |
|-----|----|----|---|---|---|
|     | 0  | 1  | 2 | 3 | 4 |
| 0   | 10 | 7  | 0 | 0 | 2 |
| 1   | 4  | 13 | 1 | 0 | 1 |
| 2   | 0  | 0  | 0 | 0 | 0 |
| 3   | 0  | 1  | 1 | 1 | 1 |
| 4   | 1  | 0  | 1 | 3 | 9 |

**Table S8:** Matrix comparing the intensity of immunolabeling of PAX5 in previous-stained cytology (RSC) and in cell blocks (CB), as assessed by a board-certified pathologist. 0: no positive cell; level 1: weak staining; level 2: moderate staining; level 3: intense staining, as compared to controls.

| RSC | CB |   |   |    |
|-----|----|---|---|----|
|     | 0  | 1 | 2 | 3  |
| 0   | 2  | 0 | 3 | 5  |
| 1   | 1  | 0 | 2 | 6  |
| 2   | 2  | 0 | 2 | 18 |
| 3   | 1  | 1 | 0 | 11 |

**Table S9:** Matrix comparing the background staining after the immunolabeling of PAX5 in previous-stained cytology (RSC) and in cell blocks (CB), as assessed by a board-certified pathologist. Score 0: no background staining; 1: weak; 2: moderate background (intense background level 3 was not observed).

| RSC | CB |   |   |
|-----|----|---|---|
|     | 0  | 1 | 2 |
| 0   | 30 | 6 | 0 |
| 1   | 11 | 0 | 1 |
| 2   | 2  | 3 | 2 |

**Table S10:** Matrix comparing the presence non-specific staining after the immunolabeling of PAX5 in previous-stained cytology (RSC) and in cell blocks (CB), as assessed by a board-certified pathologist. 0: non-specific staining absent; 1: non-specific staining present.

| RSC | CB |   |
|-----|----|---|
|     | 0  | 1 |
| 0   | 38 | 6 |
| 1   | 7  | 4 |
