# Supplementary material for: Detection of Lymphoid Markers (CD3 and PAX5) for Immunophenotyping in Dogs and Cats: Comparison of Stained Cytology Slides and Matched Cell Blocks
Source: MDPI journal article supplement (doi:10.3390/vetsci10020157), 2023-02-15
Supplement: s1 [file s1]

## Supplemental material

*Sampaio et al. Detection of lymphoid markers (CD3 and PAX5) for immunophenotyping in dogs and cats: comparison of stained cytology slides and matched cell blocks*

**Table S1:** Raw data including the type of specimen, pre-analytical variables and results of the immunolabeling for CD3 in previous Romanowsky-stained cytology slides (RSC) and cell blocks (CB) section

| Case | Specimen                       | Species | Coverslipping | Archive Time<br>(Categories) | RSC                       |                           |           |            |                       | CB                        |                           |           |            |                       |
|------|--------------------------------|---------|---------------|------------------------------|---------------------------|---------------------------|-----------|------------|-----------------------|---------------------------|---------------------------|-----------|------------|-----------------------|
|      |                                |         |               |                              | Positivity<br>(Observer1) | Positivity<br>(Observer2) | Intensity | Background | Non-Specific<br>Stain | Positivity<br>(Observer1) | Positivity<br>(Observer2) | Intensity | Background | Non-Specific<br>Stain |
| 1    | Needle rinse (lymph node)      | Dog     | Yes           | 1                            | 3                         | 4                         | 2         | 2          | 0                     | 4                         | 4                         | 3         | 0          | 0                     |
| 2    | Needle rinse (lymph node)      | Dog     | Yes           | 1                            | 0                         | 0                         | 0         | 2          | 1                     | 3                         | 4                         | 2         | 0          | 0                     |
| 3    | Needle rinse (lymph node)      | Cat     | No            | 1                            | 2                         | 1                         | 2         | 0          | 0                     | 1                         | 0                         | 3         | 1          | 1                     |
| 4    | Effusion Cell Block            | Cat     | Yes           | 1                            | 2                         | 3                         | 2         | 0          | 1                     | 4                         | 4                         | 3         | 0          | 0                     |
| 5    | Needle rinse (intestinal mass) | Cat     | Yes           | 1                            | 3                         | 2                         | 1         | 0          | 0                     | 3                         | 3                         | 3         | 1          | 0                     |
| 6    | Needle rinse (lymph node)      | Dog     | Yes           | 2                            | 1                         | 1                         | 3         | 0          | 0                     | 1                         | 1                         | 3         | 0          | 0                     |
| 7    | Needle rinse (lymph node)      | Dog     | No            | 2                            | 1                         | 0                         | 1         | 0          | 1                     | 1                         | 1                         | 3         | 0          | 0                     |
| 8    | Effusion Cell Block            | Cat     | No            | 2                            | 1                         | 0                         | 1         | 0          | 0                     | 4                         | 4                         | 3         | 0          | 0                     |
| 9    | Needle rinse (lymph node)      | Cat     | No            | 2                            | 3                         | 3                         | 1         | 1          | 1                     | 4                         | 4                         | 2         | 1          | 0                     |
| 10   | Effusion Cell Block            | Cat     | No            | 2                            | 3                         | 3                         | 2         | 1          | 0                     | 4                         | 4                         | 3         | 0          | 0                     |
| 11   | Needle rinse (spleen)          | Dog     | Yes           | 2                            | 1                         | 1                         | 3         | 0          | 1                     | 1                         | 2                         | 3         | 1          | 0                     |
| 12   | Needle rinse (lymph node)      | Cat     | Yes           | 2                            | 2                         | 2                         | 3         | 0          | 0                     | 1                         | 0                         | 1         | 0          | 0                     |
| 13   | Effusion Cell Block            | Cat     | Yes           | 2                            | 0                         | 0                         | 0         | 0          | 0                     | 4                         | 3                         | 3         | 0          | 0                     |
| 14   | Needle rinse (lymph node)      | Dog     | Yes           | 2                            | 1                         | 1                         | 3         | 1          | 0                     | 1                         | 1                         | 3         | 0          | 0                     |
| 15   | Effusion Cell Block            | Cat     | Yes           | 2                            | 1                         | 1                         | 1         | 0          | 0                     | 4                         | 4                         | 2         | 0          | 0                     |

### Legend

Archive time: **1** ≤ 15 days; **2** >15 days ≤5 months; **3** >5 ≤12 months; **4** >12 ≤24 months; **5** >24 ≤60 months; **6** >60 months

Positivity: **0** no positive cell; score **1** ≤25%; score **2** >25 and ≤50%; score **3** >50 and ≤75%; score **4** > 75% of positive cells

Intensity: **0** no positive cell; level **1** weak; level **2** moderate; level **3** intense staining, as compared to controls

Background: **0**: no background staining; **1** weak; **2** moderate; **3** intense background staining

Non-specific staining: **0**: absent; **1**: present.

NA: cells not-available/loss of material during the protocol

## Supplemental material

*Sampaio et al. Detection of lymphoid markers (CD3 and PAX5) for immunophenotyping in dogs and cats: comparison of stained cytology slides and matched cell blocks*

| Case | Specimen                  | Species | Coverslipping | Archive Time<br>(Categories) | ICC Cytology              |                           |           |            |                       | IHC Cell block            |                           |           |            |                       |
|------|---------------------------|---------|---------------|------------------------------|---------------------------|---------------------------|-----------|------------|-----------------------|---------------------------|---------------------------|-----------|------------|-----------------------|
|      |                           |         |               |                              | Positivity<br>(Observer1) | Positivity<br>(Observer2) | Intensity | Background | Non-Specific<br>Stain | Positivity<br>(Observer1) | Positivity<br>(Observer2) | Intensity | Background | Non-Specific<br>Stain |
| 16   | Effusion Cell Block       | Cat     | Yes           | 2                            | 0                         | 0                         | 0         | 0          | 0                     | 2                         | 0                         | 2         | 0          | 0                     |
| 17   | Needle rinse (lymph node) | Dog     | Yes           | 3                            | 0                         | 0                         | 0         | 0          | 0                     | 1                         | 1                         | 3         | 0          | 0                     |
| 18   | Needle rinse (lymph node) | Cat     | Yes           | 3                            | 0                         | 0                         | 0         | 0          | 0                     | 1                         | 0                         | 3         | 0          | 0                     |
| 19   | Needle rinse (lymph node) | Dog     | Yes           | 3                            | 1                         | 0                         | 3         | 1          | 0                     | 1                         | 0                         | 3         | 0          | 0                     |
| 20   | Needle rinse (lymph node) | Dog     | Yes           | 3                            | 0                         | 0                         | 0         | 1          | 0                     | 1                         | 1                         | 3         | 0          | 0                     |
| 21   | Needle rinse (lymph node) | Dog     | Yes           | 3                            | 1                         | 1                         | 2         | 0          | 0                     | 1                         | 1                         | 3         | 0          | 0                     |
| 22   | Needle rinse (lymph node) | Dog     | Yes           | 3                            | 1                         | 1                         | 1         | 0          | 1                     | 1                         | 1                         | 3         | 0          | 0                     |
| 23   | Needle rinse (lymph node) | Dog     | Yes           | 3                            | 1                         | 1                         | 3         | 0          | 0                     | 1                         | 1                         | 3         | 0          | 0                     |
| 24   | Needle rinse (lymph node) | Dog     | Yes           | 3                            | 1                         | 1                         | 1         | 0          | 0                     | 1                         | 1                         | 3         | 0          | 0                     |
| 25   | Effusion Cell Block       | Cat     | Yes           | 4                            | 1                         | 0                         | 1         | 2          | 1                     | 3                         | 3                         | 2         | 1          | 0                     |
| 26   | Effusion Cell Block       | Dog     | Yes           | 4                            | 2                         | 0                         | 1         | 0          | 0                     | 2                         | 0                         | 1         | 0          | 1                     |
| 27   | Effusion Cell Block       | Dog     | Yes           | 4                            | 0                         | 0                         | 0         | 2          | 1                     | 2                         | 4                         | 2         | 1          | 0                     |
| 28   | Needle rinse (lymph node) | Dog     | Yes           | 4                            | 2                         | 1                         | 2         | 1          | 0                     | 1                         | 0                         | 3         | 0          | 0                     |
| 29   | Needle rinse (lymph node) | Dog     | Yes           | 4                            | 0                         | 0                         | 0         | 2          | 0                     | 3                         | 0                         | 2         | 1          | 0                     |
| 30   | Effusion Cell Block       | Dog     | No            | 4                            | 4                         | 4                         | 1         | 0          | 0                     | 4                         | 4                         | 3         | 0          | 0                     |

### Legend

Archive time: **1** ≤ 15 days; **2** >15 days ≤5 months; **3** >5 ≤12 months; **4** >12 ≤24 months; **5** >24 ≤60 months; **6** >60 months

Positivity: **0** no positive cell; score **1** ≤25%; score **2** >25 and ≤50%; score **3** >50 and ≤75%; score **4** > 75% of positive cells

Intensity: **0** no positive cell; level **1** weak; level **2** moderate; level **3** intense staining, as compared to controls

Background: **0**: no background staining; **1** weak; **2** moderate; **3** intense background staining

Non-specific staining: **0**: absent; **1**: present.

NA: cells not-available/loss of material during the protocol

# Supplemental material

*Sampaio et al. Detection of lymphoid markers (CD3 and PAX5) for immunophenotyping in dogs and cats: comparison of stained cytology slides and matched cell blocks*

| Case | Specimen                      | Species | Coverslipping | Archive Time<br>(Categories) | ICC Cytology              |                           |           |            |                       | IHC Cell block            |                           |           |            |                       |
|------|-------------------------------|---------|---------------|------------------------------|---------------------------|---------------------------|-----------|------------|-----------------------|---------------------------|---------------------------|-----------|------------|-----------------------|
|      |                               |         |               |                              | Positivity<br>(Observer1) | Positivity<br>(Observer2) | Intensity | Background | Non-Specific<br>Stain | Positivity<br>(Observer1) | Positivity<br>(Observer2) | Intensity | Background | Non-Specific<br>Stain |
| 31   | Needle rinse (lymph node)     | Dog     | No            | 4                            | 1                         | 1                         | 1         | 1          | 0                     | 1                         | 1                         | 3         | 0          | 0                     |
| 32   | Needle rinse (lymph node)     | Dog     | No            | 4                            | 1                         | 1                         | 2         | 2          | 1                     | 1                         | 1                         | 3         | 0          | 0                     |
| 33   | Needle rinse (lymph node)     | Dog     | No            | 4                            | 0                         | 0                         | 0         | 0          | 0                     | 1                         | 1                         | 3         | 0          | 0                     |
| 34   | Needle rinse (cutaneous mass) | Dog     | No            | 4                            | NA                        | NA                        | NA        | NA         | NA                    | 4                         | 4                         | 3         | 0          | 0                     |
| 35   | Effusion Cell Block           | Dog     | Yes           | 5                            | NA                        | 0                         | NA        | NA         | NA                    | 3                         | 4                         | 2         | 0          | 0                     |
| 36   | Effusion Cell Block           | Cat     | Yes           | 5                            | 1                         | 0                         | 1         | 0          | 1                     | 3                         | 2                         | 3         | 0          | 1                     |
| 37   | Needle rinse (lymph node)     | Dog     | No            | 5                            | 0                         | 0                         | 0         | 0          | 1                     | 1                         | 1                         | 3         | 0          | 1                     |
| 38   | Needle rinse (lymph node)     | Dog     | Yes           | 5                            | 1                         | 4                         | 2         | 2          | 0                     | 4                         | 4                         | 3         | 0          | 0                     |
| 39   | Needle rinse (lymph node)     | Dog     | No            | 5                            | 2                         | 0                         | 1         | 1          | 1                     | 4                         | 3                         | 3         | 1          | 0                     |
| 40   | Needle rinse (lymph node)     | Dog     | No            | 5                            | 1                         | 0                         | 1         | 0          | 0                     | 1                         | 0                         | 2         | 0          | 0                     |
| 41   | Needle rinse (lymph node)     | Dog     | No            | 5                            | 1                         | 0                         | 3         | 1          | 0                     | 1                         | 0                         | 1         | 0          | 0                     |
| 42   | Needle rinse (lymph node)     | Dog     | No            | 5                            | 0                         | 0                         | 0         | 3          | 1                     | 1                         | 0                         | 1         | 0          | 0                     |
| 43   | Needle rinse (lymph node)     | Dog     | No            | 5                            | 1                         | 0                         | 2         | 1          | 0                     | 1                         | 1                         | 3         | 0          | 0                     |
| 44   | Effusion Cell Block           | Cat     | No            | 5                            | 1                         | 0                         | 3         | 1          | 1                     | 4                         | 4                         | 3         | 0          | 0                     |
| 45   | Effusion Cell Block           | Cat     | No            | 5                            | 2                         | 4                         | 1         | 0          | 0                     | 3                         | 4                         | 2         | 0          | 0                     |

## Legend

Archive time: **1** ≤ 15 days; **2** >15 days ≤5 months; **3** >5 ≤12 months; **4** >12 ≤24 months; **5** >24 ≤60 months; **6** >60 months

Positivity: **0** no positive cell; score **1** ≤25%; score **2** >25 and ≤50%; score **3** >50 and ≤75%; score **4** > 75% of positive cells

Intensity: **0** no positive cell; level **1** weak; level **2** moderate; level **3** intense staining, as compared to controls

Background: **0**: no background staining; **1** weak; **2** moderate; **3** intense background staining

Non-specific staining: **0**: absent; **1**: present.

NA: cells not-available/loss of material during the protocol

## Supplemental material

*Sampaio et al. Detection of lymphoid markers (CD3 and PAX5) for immunophenotyping in dogs and cats: comparison of stained cytology slides and matched cell blocks*

| Case | Specimen            | Species | Coverslipping | Archive Time<br>(Categories) | ICC Cytology              |                           |           |            |                       | IHC Cell block            |                           |           |            |                       |
|------|---------------------|---------|---------------|------------------------------|---------------------------|---------------------------|-----------|------------|-----------------------|---------------------------|---------------------------|-----------|------------|-----------------------|
|      |                     |         |               |                              | Positivity<br>(Observer1) | Positivity<br>(Observer2) | Intensity | Background | Non-Specific<br>Stain | Positivity<br>(Observer1) | Positivity<br>(Observer2) | Intensity | Background | Non-Specific<br>Stain |
| 46   | Effusion Cell Block | Cat     | No            | 5                            | 1                         | 0                         | 1         | 2          | 1                     | 4                         | 4                         | 2         | 0          | 0                     |
| 47   | Effusion Cell Block | Cat     | Yes           | 6                            | 2                         | 1                         | 1         | 0          | 0                     | 2                         | 0                         | 3         | 0          | 0                     |
| 48   | Effusion Cell Block | Cat     | Yes           | 6                            | 0                         | 0                         | 0         | 0          | 1                     | 3                         | 4                         | 2         | 1          | 0                     |
| 49   | Effusion Cell Block | Cat     | Yes           | 6                            | NA                        | 0                         | NA        | 1          | 0                     | 2                         | 0                         | 2         | 0          | 0                     |
| 50   | Effusion Cell Block | Cat     | Yes           | 6                            | 2                         | 1                         | 3         | 0          | 0                     | 3                         | 4                         | 3         | 0          | 0                     |
| 51   | Effusion Cell Block | Cat     | Yes           | 6                            | 1                         | 0                         | 1         | 0          | 1                     | 3                         | 4                         | 2         | 0          | 0                     |
| 52   | Effusion Cell Block | Cat     | Yes           | 6                            | 0                         | 0                         | 0         | 1          | 0                     | 1                         | 0                         | 2         | 1          | 0                     |
| 53   | Effusion Cell Block | Cat     | Yes           | 6                            | 1                         | 0                         | 1         | 0          | 1                     | 2                         | 1                         | 2         | 0          | 1                     |
| 54   | Effusion Cell Block | Cat     | No            | 6                            | NA                        | NA                        | NA        | NA         | NA                    | 0                         | 0                         | 0         | 0          | 0                     |
| 55   | Effusion Cell Block | Cat     | No            | 6                            | NA                        | NA                        | NA        | NA         | NA                    | 4                         | 4                         | 3         | 0          | 0                     |
| 56   | Effusion Cell Block | Cat     | No            | 6                            | 0                         | 0                         | 0         | 0          | 0                     | 1                         | 1                         | 3         | 0          | 0                     |
| 57   | Effusion Cell Block | Cat     | No            | 6                            | NA                        | NA                        | NA        | NA         | NA                    | 1                         | 1                         | 3         | 1          | 1                     |

### Legend

Archive time: **1** ≤ 15 days; **2** >15 days ≤5 months; **3** >5 ≤12 months; **4** >12 ≤24 months; **5** >24 ≤60 months; **6** >60 months

Positivity: **0** no positive cell; score **1** ≤25%; score **2** >25 and ≤50%; score **3** >50 and ≤75%; score **4** > 75% of positive cells

Intensity: **0** no positive cell; level **1** weak; level **2** moderate; level **3** intense staining, as compared to controls

Background: **0**: no background staining; **1** weak; **2** moderate; **3** intense background staining

Non-specific staining: **0**: absent; **1**: present.

NA: cells not-available/loss of material during the protocol
