# Supplementary material for: Detection of Lymphoid Markers (CD3 and PAX5) for Immunophenotyping in Dogs and Cats: Comparison of Stained Cytology Slides and Matched Cell Blocks
Source: Vet Sci. 2023 Feb 15;10(2):157. doi: 10.3390/vetsci10020157 (PMC9963973; doi:10.3390/vetsci10020157)
Supplement: Supplementary file 1 [file vetsci-10-00157-s001.zip]

Archive with 5 entries (5 files):
- Figure S1 supplemental with legend_revised.pdf
- Figure S2 supplemental with legend_new.pdf
- Table S1 supplemental_revised.pdf
- Table S2 supplemental_revised.pdf
- Tables S3-S10 supplemental_revised.pdf
